# Supplementary figures and images for: Combinatorial Therapy Using Dovitinib and ICI182.780 (Fulvestrant) Blocks Tumoral Activity of Endometrial Cancer Cells
Source: Oxford University Press journal article supplement (doi:10.1158/1535-7163.mct-13-0794), 2014-01-21

# Supplementary Figure 5

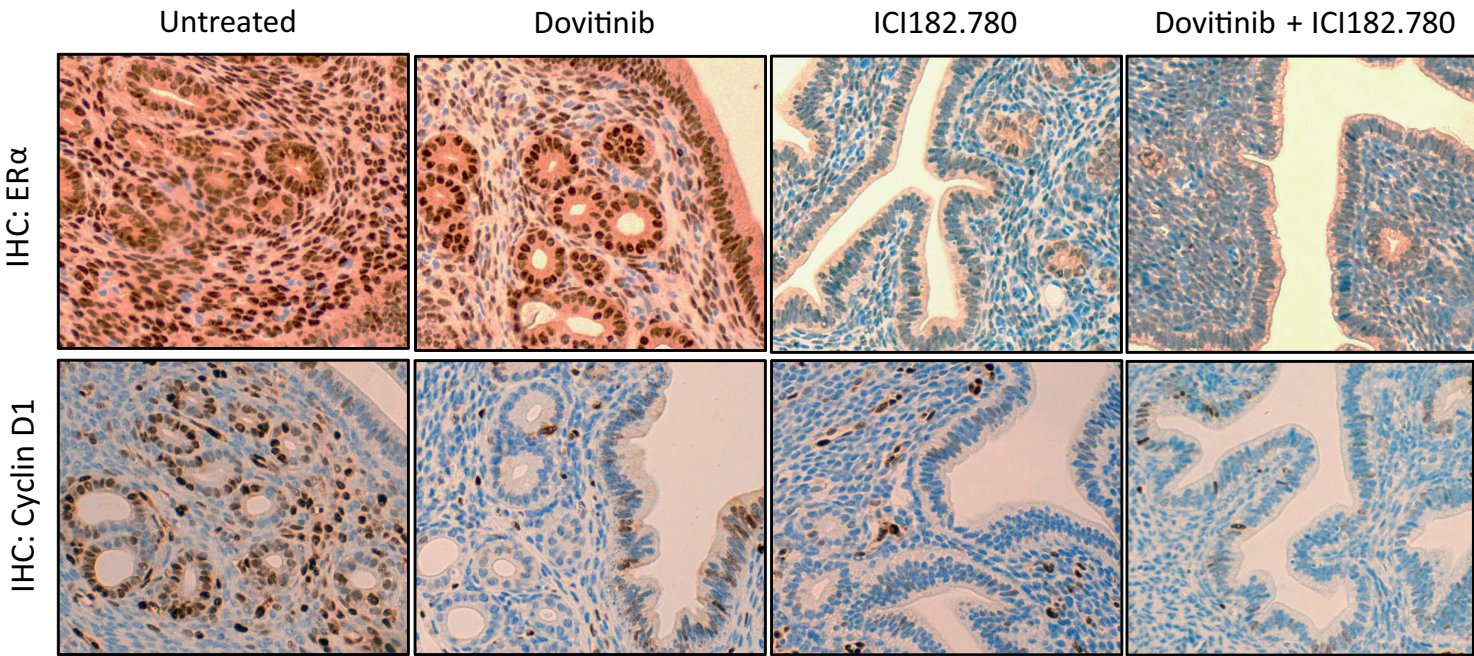

Supplement: 15357163mct130794-sup-fig_5.pdf [file 15357163mct130794-sup-fig_5.pdf]
